# Supplementary material
Source: PubMed Central journal article supplement (PMC3129184)
Supplement: supp_M111.224600_jbc.M111.224600-2.pdf [file supp_M111.224600_jbc.M111.224600-2.pdf]

**SUPPLEMENTARY MATERIAL to Auweter et al.**

Supplementary Table S1

Supplementary Table S1. Complete list of proteins identified in the secretion analysis. Number of peptides identified for each protein (Peptide Counts), posterior error probability (PEP), heavy-to-light ratio and ratio variability are shown for each protein. <sup>a</sup> no entry denotes an *S. Typhimurium* SL1344-specific protein.

| ID <sup>a</sup> | Unique Peptides | PEP        | Ratio H/L Normalized |
|-----------------|-----------------|------------|----------------------|
| PSLT037         | 11              | 1.85E-98   | 11                   |
| PSLT038         | 5               | 1.23E-26   | 11                   |
| STM0469         | 4               | 4.15E-20   | 11                   |
| STM0972         | 9               | 3.81E-31   | 11                   |
| STM1224         | 9               | 2.32E-53   | 11                   |
| STM1398         | 14              | 1.55E-175  | 11                   |
| STM1400         | 26              | 0          | 11                   |
| STM1401         | 6               | 6.96E-101  | 11                   |
| STM1631         | 4               | 1.91E-26   | 11                   |
| STM1698         | 10              | 3.01E-26   | 11                   |
| STM1055         | 1               | 0.018551   | 8.5383               |
| STM2585         | 1               | 0.00024031 | 5.8228               |
| STM1583         | 13              | 1.38E-178  | 3.9662               |
| STM1540         | 14              | 2.10E-296  | 2.9847               |
| STM2817         | 3               | 3.01E-22   | 2.8741               |
| STM2444         | 12              | 1.27E-58   | 2.7342               |
| STM2287         | 2               | 2.52E-05   | 2.7283               |
| STM2780         | 3               | 1.87E-21   | 2.6272               |
| STM1263         | 9               | 2.55E-56   | 2.6224               |
| STM0781         | 8               | 8.03E-79   | 2.5248               |
| STM3053         | 31              | 0          | 2.4934               |
| STM1119         | 6               | 1.57E-62   | 2.4744               |
| STM1891         | 14              | 2.33E-193  | 2.449                |
| STM4561         | 7               | 2.96E-70   | 2.4445               |
| STM1033         | 4               | 4.37E-07   | 2.3654               |
| STM1123         | 1               | 0.031745   | 2.3579               |
| STM0366         | 2               | 1.10E-74   | 2.2539               |
| STM1088         | 4               | 2.61E-19   | 2.2375               |
| STM1503         | 1               | 1.45E-11   | 2.1629               |
| STM2892         | 5               | 5.98E-82   | 2.1548               |
| STM3159         | 2               | 8.91E-28   | 2.1371               |
| STM1408         | 2               | 3.22E-08   | 2.0995               |
| STM1720         | 1               | 1.06E-09   | 2.0423               |
| STM1249         | 4               | 6.16E-86   | 1.9899               |
| STM1445         | 7               | 2.05E-200  | 1.9537               |
| STM4336         | 1               | 1.26E-126  | 1.947                |
| STM0823         | 1               | 1.45E-20   | 1.9383               |

|         |    |            |        |
|---------|----|------------|--------|
| STM1585 | 1  | 1.19E-11   | 1.9033 |
| STM4242 | 9  | 0          | 1.8905 |
| STM2066 | 5  | 6.89E-50   | 1.8881 |
| STM4556 | 2  | 0.01073    | 1.8636 |
| STM2607 | 1  | 4.29E-21   | 1.8594 |
| STM2276 | 2  | 7.36E-15   | 1.8238 |
| STM3884 | 7  | 1.22E-201  | 1.8061 |
| STM3007 | 1  | 2.42E-05   | 1.7979 |
| STM2885 | 17 | 0          | 1.7811 |
| STM0750 | 13 | 0          | 1.7797 |
| STM1873 | 1  | 0.080755   | 1.7781 |
| STM1805 | 3  | 5.64E-13   | 1.7763 |
| STM0209 | 15 | 1.37E-298  | 1.7709 |
| STM0181 | 5  | 2.12E-09   | 1.7616 |
| STM3307 | 3  | 6.65E-09   | 1.7603 |
| STM3176 | 1  | 0.00016622 | 1.7548 |
| STM0594 | 3  | 4.72E-11   | 1.7321 |
| STM1752 | 3  | 1.41E-09   | 1.7318 |
| STM1327 | 6  | 3.65E-41   | 1.7177 |
| STM0510 | 4  | 1.70E-31   | 1.6973 |
| STM0697 | 4  | 1.01E-30   | 1.6953 |
| STM2447 | 2  | 1.84E-47   | 1.6886 |
| STM1091 | 21 | 1.95E-192  | 1.6868 |
| STM4084 | 7  | 7.71E-25   | 1.6813 |
| STM1269 | 1  | 1.46E-28   | 1.6669 |
| STM2884 | 23 | 0          | 1.6508 |
| STM2077 | 5  | 2.90E-41   | 1.6324 |
| STM1954 | 17 | 3.04E-128  | 1.6289 |
| STM3043 | 4  | 9.58E-18   | 1.6275 |
| STM1207 | 6  | 2.17E-155  | 1.617  |
| STM0397 | 4  | 6.42E-23   | 1.6163 |
| STM4351 | 2  | 1.07E-07   | 1.608  |
| STM1157 | 11 | 3.54E-104  | 1.6063 |
| STM0849 | 17 | 5.57E-219  | 1.6036 |
| STM3267 | 11 | 0          | 1.5889 |
| STM3453 | 22 | 0          | 1.5864 |
|         | 4  | 9.86E-40   | 1.5856 |
| STM2224 | 7  | 5.19E-73   | 1.5842 |
| STM1135 | 2  | 0.00033915 | 1.5731 |
| STM2882 | 5  | 6.27E-34   | 1.5731 |
| STM1633 | 9  | 2.45E-60   | 1.5729 |
| STM3809 | 2  | 1.03E-11   | 1.5727 |
| STM1816 | 5  | 5.87E-32   | 1.5675 |
| STM4149 | 6  | 4.44E-106  | 1.5647 |
| STM4148 | 7  | 5.45E-95   | 1.5573 |
| STM1308 | 4  | 0.00040104 | 1.553  |
| STM3316 | 2  | 2.78E-21   | 1.5522 |
| STM3957 | 11 | 4.30E-242  | 1.5479 |
| STM2621 | 2  | 2.80E-23   | 1.5419 |

|            |    |           |        |
|------------|----|-----------|--------|
| STM4059    | 5  | 4.09E-45  | 1.5373 |
| STM2277    | 5  | 3.18E-31  | 1.5352 |
| STM2685    | 1  | 3.37E-40  | 1.5331 |
| STM1191    | 1  | 2.81E-48  | 1.5264 |
|            | 6  | 1.22E-185 | 1.5234 |
| STM1311    | 6  | 6.84E-103 | 1.5214 |
| SeKA_C0115 | 16 | 0         | 1.5163 |
| STM4063    | 14 | 4.88E-185 | 1.5086 |
| STM0724    | 1  | 0.044758  | 1.5083 |
| STM2076    | 4  | 7.45E-34  | 1.5056 |
| STM0597    | 2  | 1.47E-21  | 1.5025 |
| STM3424    | 3  | 0.0015285 | 1.4986 |
| STM0877    | 10 | 1.48E-208 | 1.4959 |
| STM1661    | 7  | 3.30E-66  | 1.4902 |
| STM1065    | 3  | 6.29E-46  | 1.4896 |
| STM1251    | 2  | 4.45E-18  | 1.4888 |
| STM3857    | 17 | 9.30E-280 | 1.4856 |
| STM0082    | 1  | 7.66E-134 | 1.4758 |
| STM4231    | 8  | 3.21E-209 | 1.469  |
| STM0890    | 8  | 6.85E-47  | 1.4653 |
| STM3031    | 1  | 0.085561  | 1.4647 |
| STM0748    | 25 | 0         | 1.4603 |
| STM3264    | 27 | 0         | 1.4599 |
| STM0445    | 3  | 8.13E-104 | 1.4475 |
| SLP3_0001  | 10 | 1.72E-200 | 1.4471 |
| STM0306    | 12 | 0         | 1.4462 |
| STM1783    | 2  | 1.55E-43  | 1.4458 |
| STM2612    | 3  | 2.18E-32  | 1.441  |
| STM1647    | 4  | 7.43E-46  | 1.4336 |
| STM0638    | 10 | 3.31E-212 | 1.4326 |
| STM0447    | 17 | 6.27E-266 | 1.4302 |
| STM1587    | 6  | 1.13E-91  | 1.43   |
| PSLT103    | 11 | 7.51E-302 | 1.4225 |
|            | 6  | 1.17E-71  | 1.4215 |
| STM0081    | 3  | 1.28E-08  | 1.413  |
| STM0322    | 7  | 5.89E-22  | 1.4105 |
| STM4587    | 3  | 1.18E-24  | 1.4012 |
| STM2370    | 3  | 1.61E-66  | 1.401  |
| STM1718    | 2  | 3.30E-11  | 1.3953 |
| STM0959    | 4  | 8.02E-42  | 1.3924 |
| STM1717    | 4  | 7.69E-88  | 1.3924 |
| STM0485    | 3  | 2.41E-116 | 1.3911 |
| STM1222    | 24 | 0         | 1.3909 |
| STM2487    | 4  | 6.89E-53  | 1.3907 |
| STM3630    | 28 | 0         | 1.3901 |
| STM2925    | 12 | 4.22E-211 | 1.3851 |
| STM3348    | 17 | 4.89E-294 | 1.3827 |
| STM0749    | 7  | 1.17E-216 | 1.3812 |
| STM2777    | 41 | 0         | 1.3787 |

|         |    |           |        |
|---------|----|-----------|--------|
| STM1799 | 7  | 4.39E-68  | 1.3776 |
| PSLT046 | 5  | 4.86E-17  | 1.3751 |
| STM3425 | 12 | 2.84E-260 | 1.3731 |
| STM3445 | 28 | 0         | 1.3717 |
| STM3342 | 7  | 3.01E-70  | 1.3704 |
| STM1815 | 8  | 9.95E-156 | 1.3656 |
| STM0414 | 5  | 5.96E-54  | 1.3646 |
| STM1246 | 17 | 0         | 1.3628 |
| STM2604 | 5  | 1.10E-18  | 1.3596 |
| STM0739 | 6  | 1.22E-82  | 1.3562 |
| STM1366 | 2  | 3.93E-29  | 1.3561 |
| STM3112 | 5  | 1.61E-22  | 1.3555 |
| STM3407 | 4  | 1.03E-32  | 1.3518 |
| STM1286 | 11 | 0         | 1.3457 |
| STM1328 | 15 | 0         | 1.3452 |
| STM0108 | 10 | 1.75E-102 | 1.3438 |
| STM1855 | 9  | 2.12E-105 | 1.3422 |
| STM3107 | 3  | 1.10E-09  | 1.342  |
| STM1435 | 2  | 5.24E-07  | 1.3406 |
| STM3869 | 2  | 1.46E-19  | 1.3345 |
| STM3997 | 4  | 1.50E-92  | 1.3345 |
| STM3565 | 2  | 3.00E-67  | 1.3305 |
| STM4363 | 5  | 9.40E-14  | 1.3289 |
| STM2988 | 6  | 4.44E-11  | 1.3273 |
| STM1947 | 3  | 2.01E-37  | 1.3268 |
| STM1964 | 10 | 4.13E-178 | 1.3263 |
| STM2098 | 7  | 7.05E-90  | 1.3263 |
| STM0833 | 10 | 0         | 1.323  |
| STM4229 | 7  | 1.32E-81  | 1.3229 |
| STM2354 | 14 | 3.25E-284 | 1.3215 |
| STM0244 | 6  | 1.83E-174 | 1.3213 |
| STM0830 | 9  | 3.37E-245 | 1.321  |
| STM1700 | 11 | 1.28E-173 | 1.3198 |
| STM3310 | 8  | 6.93E-74  | 1.3188 |
| PSLT009 | 6  | 5.12E-114 | 1.3138 |
| STM3077 | 9  | 4.71E-116 | 1.3138 |
| STM3440 | 7  | 1.17E-52  | 1.312  |
| STM1195 | 7  | 4.22E-127 | 1.3114 |
| STM0786 | 6  | 8.32E-163 | 1.3098 |
| STM3051 | 4  | 1.16E-05  | 1.3078 |
| STM4164 | 6  | 6.06E-73  | 1.3068 |
| STM2634 | 2  | 3.56E-24  | 1.3043 |
| STM0793 | 3  | 3.69E-95  | 1.3038 |
| STM3494 | 1  | 5.17E-20  | 1.2944 |
| STM3644 | 4  | 7.18E-129 | 1.2936 |
| STM0647 | 6  | 1.15E-96  | 1.2928 |
| STM3505 | 2  | 5.10E-28  | 1.292  |
| STM4339 | 5  | 2.03E-40  | 1.2915 |
| STM3645 | 6  | 3.35E-169 | 1.2888 |

|         |    |            |        |
|---------|----|------------|--------|
| STM0779 | 2  | 0.00045006 | 1.2883 |
| STM0665 | 10 | 6.08E-160  | 1.2882 |
| STM0406 | 1  | 9.95E-12   | 1.2845 |
| STM4582 | 8  | 2.98E-41   | 1.2783 |
| STM2267 | 18 | 0          | 1.2763 |
| STM0213 | 14 | 1.90E-258  | 1.2759 |
| STM3065 | 12 | 8.65E-191  | 1.2756 |
| STM0570 | 7  | 2.15E-103  | 1.2753 |
| STM3036 | 6  | 1.24E-33   | 1.2718 |
| STM1586 | 23 | 0          | 1.2707 |
| STM1254 | 2  | 4.98E-43   | 1.2702 |
| STM0067 | 6  | 4.43E-120  | 1.2677 |
| STM0931 | 4  | 4.27E-51   | 1.2634 |
| STM0628 | 10 | 2.27E-144  | 1.2616 |
| STM3029 | 3  | 1.26E-37   | 1.2572 |
| STM3567 | 6  | 3.67E-80   | 1.2571 |
| STM3443 | 9  | 9.90E-163  | 1.257  |
| STM4096 | 5  | 1.43E-37   | 1.2569 |
| STM1044 | 11 | 2.67E-168  | 1.2567 |
| STM1879 | 3  | 7.42E-09   | 1.252  |
|         | 7  | 2.02E-57   | 1.2484 |
| STM1711 | 4  | 5.78E-06   | 1.2372 |
| STM0999 | 17 | 0          | 1.2351 |
| STM2878 | 8  | 7.69E-44   | 1.2339 |
| STM3580 | 8  | 2.17E-205  | 1.2331 |
| STM2831 | 2  | 0.0012226  | 1.2319 |
| STM3417 | 5  | 3.95E-125  | 1.2305 |
| STM1377 | 4  | 6.05E-105  | 1.2285 |
| STM0585 | 32 | 0          | 1.227  |
| STM3448 | 4  | 1.44E-16   | 1.2255 |
| STM4512 | 12 | 1.96E-213  | 1.2254 |
| STM4292 | 2  | 2.61E-11   | 1.2253 |
| STM0191 | 27 | 0          | 1.225  |
| STM0263 | 1  | 0.081508   | 1.2248 |
| STM0633 | 3  | 1.94E-24   | 1.2239 |
| STM1431 | 7  | 9.92E-107  | 1.2239 |
| STM1242 | 6  | 2.10E-40   | 1.223  |
| STM2395 | 24 | 0          | 1.2219 |
| STM1343 | 5  | 1.62E-44   | 1.2183 |
| STM2146 | 6  | 1.85E-176  | 1.2146 |
| STM0364 | 23 | 0          | 1.2142 |
| STM1070 | 27 | 0          | 1.2135 |
| STM4460 | 2  | 1.36E-07   | 1.2129 |
| STM0224 | 26 | 0          | 1.2122 |
| STM2818 | 4  | 7.79E-27   | 1.2118 |
| STM1008 | 4  | 1.32E-69   | 1.2109 |
|         | 5  | 7.42E-60   | 1.209  |
|         | 4  | 4.10E-150  | 1.2076 |
| STM1784 | 8  | 1.17E-37   | 1.2064 |

|         |    |            |        |
|---------|----|------------|--------|
| STM1599 | 8  | 8.49E-59   | 1.2057 |
| STM4130 | 13 | 1.52E-110  | 1.2025 |
| STM2498 | 9  | 1.05E-179  | 1.1994 |
| STM1567 | 8  | 3.82E-132  | 1.1991 |
| STM3233 | 3  | 4.00E-11   | 1.197  |
|         | 6  | 4.15E-59   | 1.1937 |
|         | 6  | 6.32E-191  | 1.1933 |
| STM3062 | 12 | 6.84E-117  | 1.1919 |
|         | 3  | 0.0024053  | 1.1917 |
| STM2559 | 42 | 0          | 1.1901 |
| STM2861 | 17 | 2.59E-293  | 1.19   |
| STM1751 | 9  | 7.16E-192  | 1.1891 |
| STM3977 | 2  | 1.52E-25   | 1.1881 |
| STM3502 | 8  | 6.32E-48   | 1.1856 |
| STM1607 | 8  | 3.28E-148  | 1.1842 |
| STM2190 | 12 | 2.19E-242  | 1.1837 |
| STM3380 | 7  | 3.25E-57   | 1.1823 |
| STM2270 | 4  | 3.99E-26   | 1.1821 |
| STM2430 | 17 | 0          | 1.178  |
| STM0822 | 3  | 2.01E-23   | 1.1734 |
| STM4176 | 3  | 4.19E-07   | 1.1731 |
| STM3345 | 8  | 2.73E-52   | 1.1719 |
| STM4598 | 8  | 9.23E-96   | 1.1695 |
| STM3868 | 6  | 4.61E-72   | 1.1678 |
| STM1746 | 30 | 0          | 1.1674 |
| STM4403 | 15 | 1.48E-102  | 1.1671 |
| STM1800 | 11 | 3.00E-238  | 1.1649 |
| STM2488 | 11 | 2.81E-124  | 1.1649 |
| STM3472 | 2  | 0.00019991 | 1.1642 |
| STM4081 | 19 | 0          | 1.1639 |
| STM2122 | 2  | 3.02E-05   | 1.1631 |
| STM1572 | 12 | 1.67E-170  | 1.1619 |
| STM1819 | 5  | 1.80E-79   | 1.1608 |
| STM2391 | 9  | 3.55E-145  | 1.1607 |
| STM1210 | 2  | 1.16E-13   | 1.16   |
|         | 2  | 0.010841   | 1.1599 |
| STM4062 | 7  | 1.73E-79   | 1.1596 |
| STM0092 | 11 | 8.71E-200  | 1.1555 |
| STM3040 | 2  | 3.87E-14   | 1.1551 |
| STM3595 | 14 | 5.24E-242  | 1.1544 |
| STM0837 | 10 | 1.80E-80   | 1.1506 |
| STM4077 | 2  | 0.00043276 | 1.1495 |
| STM2165 | 8  | 1.02E-55   | 1.1482 |
| STM1679 | 12 | 1.87E-124  | 1.1474 |
| STM1478 | 11 | 2.08E-164  | 1.14   |
| STM2605 | 4  | 1.25E-44   | 1.1391 |
| STM0711 | 1  | 3.65E-70   | 1.1386 |
| STM0963 | 4  | 1.98E-32   | 1.1385 |
| STM3209 | 6  | 2.08E-26   | 1.1374 |

|          |    |           |        |
|----------|----|-----------|--------|
| STM3557  | 27 | 0         | 1.1368 |
| STM0186  | 4  | 2.66E-65  | 1.1354 |
| STM3594  | 5  | 3.21E-39  | 1.1331 |
| STM1449  | 9  | 3.19E-154 | 1.1301 |
| STM4415  | 6  | 1.30E-15  | 1.1296 |
|          | 11 | 4.58E-193 | 1.1289 |
| STM3319  | 6  | 8.16E-55  | 1.1285 |
| STM3041c | 3  | 3.46E-28  | 1.1276 |
| STM3038  | 9  | 2.50E-71  | 1.1249 |
|          | 9  | 0         | 1.1235 |
| STM1778  | 9  | 5.36E-118 | 1.1229 |
| STM2791  | 4  | 1.30E-11  | 1.1227 |
| STM1117  | 5  | 1.35E-35  | 1.1185 |
| STM4192  | 2  | 7.10E-11  | 1.1176 |
| STM1330  | 9  | 1.48E-77  | 1.1165 |
| STM0413  | 10 | 8.88E-222 | 1.115  |
| STM2829  | 12 | 1.03E-275 | 1.1132 |
| STM4171  | 2  | 1.88E-15  | 1.1125 |
|          | 5  | 3.74E-58  | 1.1102 |
| STM2813  | 2  | 2.88E-18  | 1.1094 |
| STM1433  | 3  | 5.30E-24  | 1.1089 |
| STM0488  | 8  | 6.13E-102 | 1.1079 |
| STM3898  | 6  | 2.86E-16  | 1.1076 |
| STM2294  | 8  | 8.50E-239 | 1.1072 |
| STM1302  | 4  | 4.57E-29  | 1.1064 |
| STM0617  | 12 | 0         | 1.1059 |
| STM3853  | 3  | 3.74E-18  | 1.1029 |
| STM2199  | 38 | 0         | 1.1025 |
| STM2544  | 6  | 7.09E-136 | 1.1013 |
|          | 2  | 2.57E-23  | 1.0991 |
| STM1909  | 16 | 2.23E-183 | 1.0978 |
| STM2681  | 10 | 1.53E-133 | 1.0948 |
| STM2949  | 4  | 9.96E-25  | 1.089  |
| STM2545  | 6  | 4.48E-85  | 1.0857 |
| STM3423  | 7  | 9.09E-205 | 1.0843 |
| STM3186  | 13 | 3.93E-242 | 1.0821 |
| STM1310  | 2  | 0.0021941 | 1.0813 |
| STM3286  | 1  | 2.93E-06  | 1.0804 |
| STM2603  | 28 | 0         | 1.0792 |
| STM2366  | 4  | 3.19E-14  | 1.0774 |
| STM3063  | 7  | 3.50E-131 | 1.0743 |
| STM3464  | 5  | 9.03E-82  | 1.0736 |
| STM4490  | 2  | 0.083027  | 1.0725 |
| STM4163  | 6  | 2.29E-72  | 1.0721 |
| STM1197  | 5  | 3.70E-49  | 1.07   |
| STM0930  | 2  | 3.57E-29  | 1.0699 |
| STM0166  | 5  | 7.29E-97  | 1.0649 |
| STM3466  | 9  | 8.08E-117 | 1.0649 |
| STM1216  | 1  | 0.03431   | 1.0646 |

|           |    |            |        |
|-----------|----|------------|--------|
| STM1796   | 22 | 1.03E-300  | 1.0639 |
| STM0216   | 16 | 3.22E-268  | 1.0618 |
| STM2673   | 4  | 7.99E-28   | 1.0613 |
| STM2520   | 12 | 0          | 1.0612 |
| STM0504   | 2  | 9.45E-06   | 1.0603 |
| STM2392   | 6  | 1.19E-70   | 1.0596 |
| STM1508   | 3  | 0.010043   | 1.0558 |
| STM1622   | 10 | 6.47E-103  | 1.0557 |
| STM3839   | 2  | 0.00078631 | 1.0491 |
| STM3214   | 4  | 2.42E-05   | 1.0478 |
| STM0225   | 7  | 1.69E-119  | 1.0462 |
| STM0614   | 7  | 7.64E-266  | 1.0459 |
| STM0415   | 2  | 4.00E-27   | 1.0454 |
| STM2748   | 2  | 3.60E-148  | 1.0452 |
| SLP2_0020 | 4  | 4.21E-13   | 1.0434 |
| STM4567   | 10 | 2.55E-97   | 1.0418 |
| STM3686   | 7  | 4.16E-35   | 1.0415 |
| STM1886   | 5  | 1.25E-08   | 1.041  |
| STM1560   | 4  | 2.02E-19   | 1.0391 |
| STM3727   | 2  | 2.84E-81   | 1.0383 |
| STM2606   | 5  | 8.55E-06   | 1.0379 |
| STM3441   | 9  | 1.01E-138  | 1.0374 |
| STM3060   | 2  | 7.25E-19   | 1.036  |
| STM3429   | 9  | 2.67E-148  | 1.0331 |
| STM4368   | 12 | 1.00E-117  | 1.0324 |
| STM3436   | 3  | 4.69E-18   | 1.0321 |
| STM3837   | 7  | 5.70E-70   | 1.0317 |
| STM3285   | 6  | 5.41E-120  | 1.0312 |
| STM2347   | 2  | 3.83E-56   | 1.0299 |
| STM3428   | 16 | 0          | 1.0296 |
| STM0012   | 34 | 0          | 1.0292 |
| STM2799   | 7  | 4.13E-141  | 1.0269 |
|           | 1  | 1.07E-26   | 1.0263 |
| STM2093   | 3  | 9.13E-11   | 1.025  |
| STM2872   | 2  | 1.68E-43   | 1.0247 |
| STM0696   | 2  | 1.01E-13   | 1.0245 |
|           | 6  | 3.27E-251  | 1.0243 |
| STM3374   | 13 | 2.13E-208  | 1.0227 |
| STM2337   | 7  | 4.15E-108  | 1.0211 |
| STM0641   | 2  | 1.80E-14   | 1.0203 |
| STM2072   | 12 | 6.92E-111  | 1.0179 |
| STM0043   | 4  | 1.86E-56   | 1.0174 |
| STM2526   | 8  | 9.07E-157  | 1.0156 |
| STM2245   | 12 | 4.82E-234  | 1.0126 |
| STM1080   | 3  | 1.53E-31   | 1.0107 |
| STM3296   | 5  | 3.38E-15   | 1.0103 |
| STM3426   | 10 | 9.56E-111  | 1.0079 |
| STM0093   | 7  | 6.62E-104  | 1.0072 |
| STM4391   | 8  | 3.97E-211  | 1.0064 |



|           |    |            |         |
|-----------|----|------------|---------|
| STM2090   | 16 | 2.00E-147  | 1.004   |
| STM3316   | 3  | 1.16E-31   | 1.0036  |
| STM2983   | 2  | 3.89E-77   | 1.0016  |
| STM2403   | 3  | 2.61E-31   | 0.99872 |
| SLP2_0019 | 3  | 1.06E-26   | 0.99631 |
| STM0245   | 11 | 2.58E-273  | 0.9959  |
| STM4319   | 17 | 0          | 0.99554 |
| STM3090   | 9  | 7.78E-55   | 0.99105 |
| STM4393   | 4  | 2.85E-75   | 0.99017 |
| STM3613   | 3  | 0.0019315  | 0.98836 |
| STM2073   | 11 | 3.11E-193  | 0.97855 |
| STM1882   | 6  | 2.40E-17   | 0.97811 |
| STM3093   | 3  | 8.05E-21   | 0.97632 |
| STM4089   | 5  | 1.35E-93   | 0.97386 |
| STM2355   | 5  | 5.47E-90   | 0.9733  |
| STM3564   | 9  | 5.25E-72   | 0.97328 |
| STM1069   | 1  | 0.0045786  | 0.97056 |
| STM3298   | 3  | 3.12E-16   | 0.9685  |
| STM4330   | 51 | 0          | 0.9683  |
| STM0217   | 15 | 6.83E-155  | 0.96805 |
| STM3434   | 11 | 1.06E-170  | 0.96721 |
| STM3728   | 4  | 5.15E-35   | 0.96534 |
|           | 57 | 0          | 0.95995 |
| STM1935   | 2  | 6.10E-48   | 0.95924 |
| STM0607   | 3  | 9.92E-12   | 0.95688 |
| STM0219   | 7  | 1.18E-164  | 0.95479 |
| STM3427   | 2  | 0.0049908  | 0.95423 |
| STM1426   | 5  | 1.54E-64   | 0.954   |
| STM4092   | 2  | 3.78E-50   | 0.95378 |
| STM0218   | 10 | 2.98E-153  | 0.95284 |
| STM3761   | 5  | 4.30E-64   | 0.95221 |
| STM1960   | 3  | 8.22E-14   | 0.95041 |
| STM3903   | 2  | 4.62E-63   | 0.9497  |
| STM3054   | 5  | 1.03E-32   | 0.94897 |
| STM1558   | 6  | 6.75E-69   | 0.94881 |
| STM2578   | 4  | 1.74E-43   | 0.9483  |
| STM3165   | 5  | 0.00013066 | 0.94816 |
| STM3433   | 3  | 5.55E-89   | 0.94745 |
|           | 18 | 0          | 0.94653 |
| STM3385   | 2  | 3.90E-16   | 0.94554 |
| STM4221   | 36 | 0          | 0.94428 |
| STM3283   | 4  | 4.26E-07   | 0.94407 |
| STM1467   | 8  | 1.41E-98   | 0.94149 |
|           | 34 | 0          | 0.94125 |
| STM1153   | 1  | 2.82E-14   | 0.94003 |
| STM2676   | 8  | 4.21E-136  | 0.93865 |
| STM4150   | 10 | 9.95E-170  | 0.93763 |
| STM1894   | 6  | 9.47E-46   | 0.93655 |
| STM0377   | 5  | 2.56E-33   | 0.93551 |

|           |    |           |         |
|-----------|----|-----------|---------|
| STM3526   | 14 | 5.87E-104 | 0.93523 |
| STM0211   | 10 | 4.99E-69  | 0.93361 |
| STM2952   | 22 | 0         | 0.93308 |
| STM1337   | 2  | 1.56E-14  | 0.93196 |
| STM3418   | 8  | 1.01E-111 | 0.93194 |
| STM0599   | 2  | 4.40E-19  | 0.93122 |
| STM4256   | 7  | 8.81E-149 | 0.93071 |
| STM3421   | 7  | 2.28E-126 | 0.93022 |
| STM2166   | 27 | 0         | 0.92814 |
| STM4108   | 1  | 3.38E-05  | 0.92694 |
| SLP2_0021 | 2  | 3.40E-13  | 0.92651 |
| STM0182   | 3  | 1.49E-40  | 0.92484 |
| STM3430   | 6  | 5.53E-138 | 0.92375 |
| STM1318   | 9  | 2.17E-87  | 0.92372 |
| STM1444   | 4  | 1.18E-41  | 0.92258 |
| STM2826   | 1  | 0.0014715 | 0.92243 |
| STM2406   | 3  | 3.34E-55  | 0.91843 |
| STM4119   | 13 | 2.42E-117 | 0.91761 |
|           | 2  | 6.84E-16  | 0.91642 |
| STM3909   | 27 | 0         | 0.91585 |
| STM4151   | 9  | 3.59E-174 | 0.91492 |
| PSLT106   | 2  | 3.12E-35  | 0.91156 |
| STM3078   | 7  | 2.16E-83  | 0.91127 |
| STM3970   | 4  | 1.74E-93  | 0.91063 |
| STM0772   | 19 | 2.32E-252 | 0.90762 |
| STM0435   | 3  | 1.26E-11  | 0.90604 |
| STM2059   | 2  | 2.70E-33  | 0.90469 |
| STM1259   | 10 | 3.47E-30  | 0.90453 |
| STM2663   | 6  | 4.23E-79  | 0.90443 |
| STM1845   | 4  | 9.46E-10  | 0.90285 |
| STM3137   | 12 | 1.45E-139 | 0.90063 |
| PSLT053   | 5  | 1.30E-06  | 0.89971 |
| STM2272   | 7  | 7.66E-33  | 0.89907 |
| STM1842   | 2  | 1.44E-31  | 0.89851 |
| STM3422   | 3  | 5.37E-41  | 0.89368 |
| STM2862   | 3  | 3.88E-28  | 0.89158 |
| STM2546   | 3  | 1.33E-41  | 0.89075 |
| STM3486   | 2  | 4.88E-20  | 0.8897  |
| STM0738   | 6  | 8.41E-159 | 0.88931 |
|           | 4  | 2.51E-84  | 0.8879  |
| STM0629   | 2  | 1.20E-07  | 0.887   |
| STM0982   | 4  | 5.00E-35  | 0.88595 |
| STM1255   | 4  | 0.0094531 | 0.88471 |
| STM1358   | 10 | 4.62E-77  | 0.88441 |
| STM2346   | 4  | 1.30E-15  | 0.88431 |
| STM1953   | 4  | 3.39E-18  | 0.88098 |
| STM0392   | 8  | 1.32E-147 | 0.88007 |
| STM1163   | 7  | 2.64E-80  | 0.87935 |
| STM1150   | 10 | 2.85E-160 | 0.87848 |

|            |    |            |         |
|------------|----|------------|---------|
| STM0451    | 4  | 1.05E-113  | 0.87807 |
| STM4109    | 5  | 6.37E-45   | 0.87708 |
| STM2226    | 12 | 5.27E-194  | 0.87694 |
| STM0693    | 5  | 1.14E-83   | 0.87633 |
| STM0981    | 17 | 1.06E-202  | 0.87501 |
| STM3416    | 12 | 8.80E-124  | 0.87477 |
| STM3282    | 33 | 0          | 0.87256 |
| STM1884    | 10 | 1.94E-123  | 0.87133 |
| STM2565    | 45 | 0          | 0.87036 |
| STM3708    | 3  | 8.95E-17   | 0.8696  |
| STM0486    | 2  | 3.71E-31   | 0.86914 |
| STM3684    | 2  | 3.14E-16   | 0.86833 |
| STM3710    | 7  | 1.58E-73   | 0.86813 |
| STM1549    | 1  | 0.018534   | 0.86642 |
| STM1512    | 9  | 1.40E-84   | 0.86265 |
| STM1466    | 3  | 0.00054504 | 0.86258 |
| STM3299    | 2  | 4.32E-24   | 0.86235 |
| STM3597    | 24 | 0          | 0.86233 |
| STM4237    | 3  | 1.40E-25   | 0.86198 |
| STM2155    | 6  | 3.13E-24   | 0.86145 |
| STM4394    | 12 | 2.67E-221  | 0.8599  |
| STM1296    | 7  | 1.50E-151  | 0.85984 |
| STM0694    | 7  | 1.81E-276  | 0.85937 |
| STM3415    | 11 | 3.34E-84   | 0.85849 |
| STM4585    | 2  | 9.79E-23   | 0.85669 |
| STM2147    | 4  | 1.03E-69   | 0.85668 |
| STM3511    | 4  | 2.41E-36   | 0.85654 |
| STM3707    | 1  | 0.025144   | 0.85477 |
| STM3447    | 11 | 3.03E-129  | 0.85395 |
| STM4153    | 11 | 7.38E-136  | 0.85274 |
| STM4086    | 19 | 2.05E-249  | 0.8507  |
| STM4026    | 4  | 6.15E-07   | 0.85054 |
| SLP3_0014  | 2  | 5.49E-23   | 0.84972 |
| STM4477    | 17 | 1.15E-226  | 0.84889 |
| STM0578    | 7  | 3.50E-67   | 0.84856 |
| SeKA_C0022 | 41 | 0          | 0.84847 |
| STM0684    | 8  | 7.36E-166  | 0.84828 |
| STM2297    | 5  | 1.58E-35   | 0.84784 |
| STM3915    | 4  | 6.91E-34   | 0.84496 |
| STM3877    | 1  | 8.85E-26   | 0.84412 |
| STM3133    | 4  | 9.77E-17   | 0.84131 |
| STM1502    | 4  | 1.66E-41   | 0.84129 |
| STM1164    | 2  | 7.78E-12   | 0.83986 |
| STM0588    | 2  | 6.10E-09   | 0.83837 |
| STM2091    | 24 | 1.00E-254  | 0.83692 |
| STM4170    | 5  | 9.69E-160  | 0.83683 |
| STM1822    | 4  | 7.69E-63   | 0.83576 |
| STM1196    | 4  | 2.85E-43   | 0.83497 |
| STM3537    | 2  | 1.35E-38   | 0.83471 |

|           |    |            |         |
|-----------|----|------------|---------|
| STM0215   | 1  | 2.64E-14   | 0.8343  |
| STM2335   | 10 | 7.32E-108  | 0.83253 |
| SLP3_0004 | 6  | 3.41E-34   | 0.83116 |
| STM3076   | 15 | 1.92E-112  | 0.82827 |
| STM0534   | 6  | 1.21E-123  | 0.82814 |
| STM0609   | 2  | 7.26E-06   | 0.82759 |
|           | 1  | 2.49E-39   | 0.82669 |
| STM3835   | 2  | 1.17E-08   | 0.82669 |
| STM1334   | 3  | 1.94E-22   | 0.82491 |
| STM4458   | 5  | 1.91E-82   | 0.82485 |
| STM4447   | 2  | 0.080147   | 0.82404 |
| STM3500   | 26 | 0          | 0.82363 |
| STM4366   | 13 | 8.39E-82   | 0.82166 |
| STM0154   | 32 | 0          | 0.82092 |
| STM3999   | 3  | 1.81E-47   | 0.81763 |
| STM4453   | 3  | 4.16E-26   | 0.81659 |
| STM2543   | 3  | 0.0010722  | 0.81648 |
| STM0730   | 5  | 8.43E-25   | 0.81596 |
| STM0310   | 7  | 8.73E-104  | 0.81461 |
| STM0487   | 6  | 6.79E-63   | 0.81365 |
| STM1349   | 29 | 0          | 0.81266 |
| STM4414   | 14 | 1.55E-163  | 0.81259 |
| STM1238   | 32 | 0          | 0.81241 |
| STM0637   | 3  | 0.00083192 | 0.80989 |
| STM2094   | 4  | 3.60E-24   | 0.80894 |
| STM1231   | 11 | 2.53E-170  | 0.80799 |
| STM1682   | 3  | 1.24E-98   | 0.80785 |
| STM2157   | 3  | 0.0015631  | 0.80743 |
| STM4569   | 16 | 1.51E-233  | 0.80583 |
| STM1067   | 10 | 4.60E-82   | 0.80548 |
| STM0448   | 5  | 2.99E-64   | 0.8054  |
| STM0046   | 18 | 5.05E-137  | 0.80427 |
| STM2472   | 24 | 2.96E-213  | 0.80342 |
| STM3665   | 2  | 0.0071641  | 0.80196 |
| STM1769   | 2  | 1.94E-41   | 0.80195 |
| STM4154   | 22 | 6.95E-248  | 0.80191 |
| STM2555   | 11 | 2.58E-40   | 0.80026 |
| STM2661   | 5  | 3.07E-34   | 0.79989 |
| STM4361   | 8  | 2.56E-100  | 0.79959 |
| STM0153   | 22 | 0          | 0.79928 |
|           | 9  | 3.31E-102  | 0.7979  |
| STM0465   | 5  | 2.87E-69   | 0.79777 |
| STM4459   | 7  | 4.28E-76   | 0.79736 |
| STM0007   | 27 | 0          | 0.79733 |
| STM0417   | 5  | 1.58E-197  | 0.79657 |
|           | 2  | 6.16E-07   | 0.79567 |
| STM1322   | 8  | 8.63E-48   | 0.79479 |
|           | 6  | 3.17E-74   | 0.79455 |
| STM1391   | 2  | 9.98E-05   | 0.7944  |

|           |    |            |         |
|-----------|----|------------|---------|
| STM2081   | 44 | 0          | 0.79382 |
| STM1290   | 34 | 0          | 0.79372 |
| STM1057   | 26 | 0          | 0.79331 |
| STM4570   | 18 | 3.40E-276  | 0.79264 |
| STM3514   | 3  | 0.00028684 | 0.79119 |
| SLP3_0011 | 4  | 2.50E-16   | 0.78889 |
|           | 9  | 2.65E-115  | 0.7885  |
| STM2141   | 17 | 0          | 0.7877  |
| STM2092   | 7  | 1.59E-121  | 0.78603 |
| STM3545   | 14 | 4.88E-157  | 0.78547 |
| STM3431   | 2  | 0.0010996  | 0.78511 |
| STM4397   | 3  | 5.09E-75   | 0.78453 |
| STM0950   | 5  | 1.48E-88   | 0.78384 |
| STM2489   | 12 | 0          | 0.78092 |
| STM1289   | 10 | 1.37E-116  | 0.78054 |
| STM3446   | 28 | 0          | 0.78047 |
| STM1339   | 5  | 3.15E-50   | 0.78034 |
|           | 6  | 1.83E-43   | 0.77903 |
| STM3055   | 11 | 2.94E-110  | 0.77864 |
| STM3984   | 11 | 5.47E-111  | 0.77697 |
| STM4254   | 15 | 3.26E-295  | 0.7766  |
| STM2683   | 3  | 3.17E-17   | 0.77526 |
| STM1136   | 3  | 0.00021222 | 0.77437 |
| STM0536   | 2  | 0.00020429 | 0.77326 |
| STM0402   | 9  | 2.66E-53   | 0.77241 |
| STM1959   | 17 | 0          | 0.77172 |
| STM3439   | 9  | 2.47E-106  | 0.77065 |
| STM3965   | 2  | 3.83E-18   | 0.77021 |
| STM0180   | 3  | 9.53E-27   | 0.77015 |
| STM2582   | 2  | 0.067917   | 0.76763 |
| STM0171   | 7  | 4.06E-96   | 0.76565 |
| STM2378   | 15 | 0          | 0.76412 |
| STM3157   | 16 | 0          | 0.76283 |
| STM0977   | 16 | 0          | 0.762   |
| STM2830   | 3  | 1.07E-67   | 0.76042 |
|           | 3  | 5.11E-06   | 0.76009 |
| STM2327   | 1  | 0.014869   | 0.7597  |
| STM3359   | 19 | 0          | 0.75627 |
| STM3399   | 2  | 1.09E-26   | 0.75479 |
| STM4250   | 2  | 1.20E-18   | 0.75447 |
|           | 4  | 2.60E-08   | 0.75268 |
| STM4028   | 4  | 5.16E-61   | 0.75239 |
|           | 7  | 3.37E-66   | 0.75002 |
| STM2415   | 8  | 6.20E-30   | 0.74954 |
| STM1756   | 15 | 1.67E-202  | 0.7482  |
| STM1450   | 3  | 2.57E-33   | 0.74751 |
| STM0648   | 4  | 9.63E-38   | 0.74747 |
| STM3069   | 33 | 0          | 0.74718 |
| STM2510   | 18 | 6.69E-240  | 0.74513 |

|         |    |            |         |
|---------|----|------------|---------|
|         | 5  | 3.38E-51   | 0.74472 |
| STM1378 | 29 | 0          | 0.74366 |
| STM0317 | 6  | 3.10E-43   | 0.74047 |
|         | 5  | 1.26E-122  | 0.73848 |
| STM0168 | 2  | 8.83E-07   | 0.73825 |
| STM0372 | 2  | 1.88E-07   | 0.73659 |
| STM3206 | 6  | 1.19E-64   | 0.73609 |
| STM2282 | 24 | 2.58E-248  | 0.73553 |
| STM3968 | 12 | 0          | 0.7323  |
| STM1371 | 2  | 1.84E-05   | 0.73199 |
| STM0892 | 5  | 2.00E-143  | 0.73141 |
| STM3136 | 4  | 0.00016149 | 0.73035 |
| STM4007 | 25 | 0          | 0.72905 |
| STM3701 | 4  | 1.01E-19   | 0.7272  |
| STM2561 | 4  | 1.18E-16   | 0.72713 |
| STM3334 | 13 | 9.94E-116  | 0.72686 |
| STM2511 | 11 | 8.75E-154  | 0.723   |
| STM4055 | 12 | 0          | 0.71862 |
| STM3498 | 2  | 3.71E-14   | 0.71737 |
| STM3437 | 12 | 1.80E-111  | 0.71662 |
|         | 7  | 7.56E-111  | 0.71577 |
| STM0418 | 2  | 3.13E-06   | 0.71574 |
| STM3709 | 21 | 0          | 0.71528 |
| STM3483 | 10 | 2.64E-155  | 0.71317 |
| STM2338 | 10 | 1.75E-117  | 0.71307 |
| STM3406 | 3  | 2.03E-22   | 0.71129 |
| STM1336 | 5  | 8.22E-35   | 0.70644 |
| STM1899 | 2  | 2.38E-21   | 0.70562 |
| STM1373 | 12 | 5.40E-95   | 0.70494 |
| STM0433 | 3  | 1.13E-59   | 0.70185 |
| STM3979 | 1  | 3.30E-13   | 0.69941 |
| STM2473 | 17 | 6.77E-229  | 0.6952  |
| STM4152 | 3  | 4.17E-58   | 0.69381 |
| STM2660 | 7  | 1.08E-46   | 0.69114 |
| STM0998 | 30 | 0          | 0.69104 |
| STM1895 | 2  | 4.32E-28   | 0.69055 |
| STM3100 | 2  | 7.67E-17   | 0.68958 |
| STM2795 | 5  | 1.04E-110  | 0.68828 |
| STM0698 | 5  | 7.33E-51   | 0.68682 |
| STM3111 | 2  | 9.09E-26   | 0.68674 |
| STM3689 | 1  | 1.78E-06   | 0.68598 |
| STM4329 | 6  | 6.76E-104  | 0.68594 |
| STM2061 | 4  | 2.96E-32   | 0.68533 |
| STM3866 | 4  | 3.88E-46   | 0.68496 |
| STM3304 | 3  | 4.44E-13   | 0.68324 |
|         | 11 | 2.38E-181  | 0.68153 |
| STM4475 | 4  | 5.84E-13   | 0.68121 |
| STM1581 | 2  | 0.00013072 | 0.67983 |
| STM1749 | 6  | 2.45E-40   | 0.67722 |

|         |    |            |         |
|---------|----|------------|---------|
| STM1589 | 4  | 1.65E-21   | 0.67681 |
| STM1963 | 9  | 2.64E-23   | 0.67677 |
| STM3068 | 19 | 0          | 0.67526 |
| STM1888 | 2  | 0.017852   | 0.67499 |
| STM0973 | 10 | 8.83E-62   | 0.67271 |
| STM0543 | 3  | 1.80E-42   | 0.66837 |
| STM4519 | 28 | 0          | 0.66809 |
| STM0785 | 15 | 2.81E-238  | 0.66649 |
| STM2194 | 11 | 3.77E-127  | 0.66279 |
| STM0152 | 48 | 0          | 0.66026 |
| STM3321 | 1  | 0.015012   | 0.65657 |
| STM0773 | 9  | 1.93E-187  | 0.65288 |
| STM3867 | 18 | 3.27E-289  | 0.65073 |
| STM3339 | 6  | 6.59E-33   | 0.64998 |
| STM4326 | 24 | 0          | 0.64489 |
| STM1469 | 2  | 7.34E-39   | 0.64332 |
| STM3135 | 2  | 0.0024054  | 0.64146 |
| STM3015 | 2  | 0.046877   | 0.64113 |
| STM3865 | 13 | 4.21E-229  | 0.63986 |
| STM0008 | 3  | 0.00051365 | 0.63695 |
| STM1299 | 8  | 1.54E-119  | 0.63351 |
| STM0686 | 9  | 1.98E-89   | 0.631   |
| STM3481 | 2  | 5.12E-07   | 0.62875 |
| STM3539 | 6  | 4.71E-82   | 0.62658 |
| STM1690 | 6  | 1.52E-65   | 0.61778 |
| STM3344 | 6  | 7.91E-47   | 0.61488 |
| STM1940 | 3  | 8.34E-20   | 0.61356 |
| STM0537 | 2  | 0.0024087  | 0.61247 |
| STM0608 | 14 | 9.78E-264  | 0.60992 |
| STM0386 | 2  | 2.08E-23   | 0.60779 |
| STM1772 | 19 | 1.03E-177  | 0.60381 |
| STM2536 | 13 | 3.93E-183  | 0.59932 |
| STM0737 | 6  | 3.69E-28   | 0.59867 |
| STM0958 | 13 | 0          | 0.59186 |
| STM3048 | 8  | 1.04E-141  | 0.58813 |
| STM1338 | 5  | 3.10E-35   | 0.58512 |
| STM4162 | 2  | 3.67E-17   | 0.58289 |
| STM0598 | 6  | 1.45E-72   | 0.58135 |
| STM1732 | 1  | 6.23E-08   | 0.57894 |
| STM2193 | 3  | 8.47E-57   | 0.57275 |
| STM0255 | 2  | 0.012754   | 0.56994 |
| STM1597 | 4  | 6.33E-81   | 0.56917 |
| STM2433 | 6  | 4.34E-91   | 0.56101 |
| STM2802 | 3  | 1.26E-117  | 0.54935 |
| STM4184 | 11 | 1.60E-110  | 0.53353 |
| STM1712 | 7  | 1.50E-107  | 0.53127 |
| STM1641 | 2  | 3.42E-05   | 0.53118 |
| STM4356 | 6  | 6.52E-24   | 0.52569 |
| STM0831 | 9  | 7.87E-189  | 0.52426 |

|         |    |           |          |
|---------|----|-----------|----------|
| STM3808 | 1  | 4.62E-09  | 0.51663  |
| STM4091 | 5  | 3.44E-08  | 0.51523  |
| STM1000 | 3  | 2.66E-08  | 0.51324  |
| STM4100 | 6  | 1.80E-61  | 0.51241  |
| STM4064 | 10 | 4.39E-83  | 0.51195  |
| STM3223 | 2  | 5.07E-12  | 0.50937  |
| STM3435 | 8  | 4.74E-167 | 0.49898  |
| STM3875 | 1  | 0.0010092 | 0.4979   |
| STM4364 | 3  | 0.05539   | 0.49225  |
| STM0119 | 3  | 7.75E-24  | 0.48681  |
| STM4106 | 2  | 0.078794  | 0.48298  |
| STM1901 | 2  | 0.0038404 | 0.48191  |
| STM0004 | 7  | 5.09E-94  | 0.47792  |
| STM0227 | 6  | 1.01E-63  | 0.46154  |
| STM3735 | 6  | 3.29E-92  | 0.45951  |
| STM3414 | 6  | 7.21E-74  | 0.45907  |
| STM1563 | 4  | 4.92E-75  | 0.44063  |
| STM2456 | 2  | 2.86E-13  | 0.42859  |
| STM3070 | 2  | 7.04E-27  | 0.42297  |
| STM1232 | 3  | 0.029048  | 0.36343  |
| STM1780 | 16 | 0         | 0.3595   |
| STM0452 | 2  | 1.89E-19  | 0.35705  |
| STM0935 | 1  | 0.098286  | 0.31236  |
| STM1561 | 2  | 2.55E-24  | 0.2917   |
| STM1168 | 3  | 2.57E-14  | 0.29093  |
| STM2584 | 2  | 0.003021  | 0.29053  |
| STM0803 | 5  | 4.19E-40  | 0.27633  |
| STM1730 | 4  | 1.66E-21  | 0.22132  |
| STM1261 | 1  | 3.11E-43  | 0.19066  |
| STM0316 | 19 | 6.50E-279 | 0.18291  |
| STM4240 | 3  | 3.63E-20  | 0.09573  |
| STM1729 | 11 | 4.09E-177 | 0.084803 |
| STM3543 | 1  | 0.075037  | 0.041945 |
| STM1731 | 19 | 5.23E-261 | 0.02304  |
| STM2427 | 1  | 0.047893  | 0.022837 |
